# Supplementary material
Source: Springer Nature journal article supplement (https://www.springermedizin.de/resource/supplementary/12943_2011_916_MOESM13_ESM.pdf/9551998)

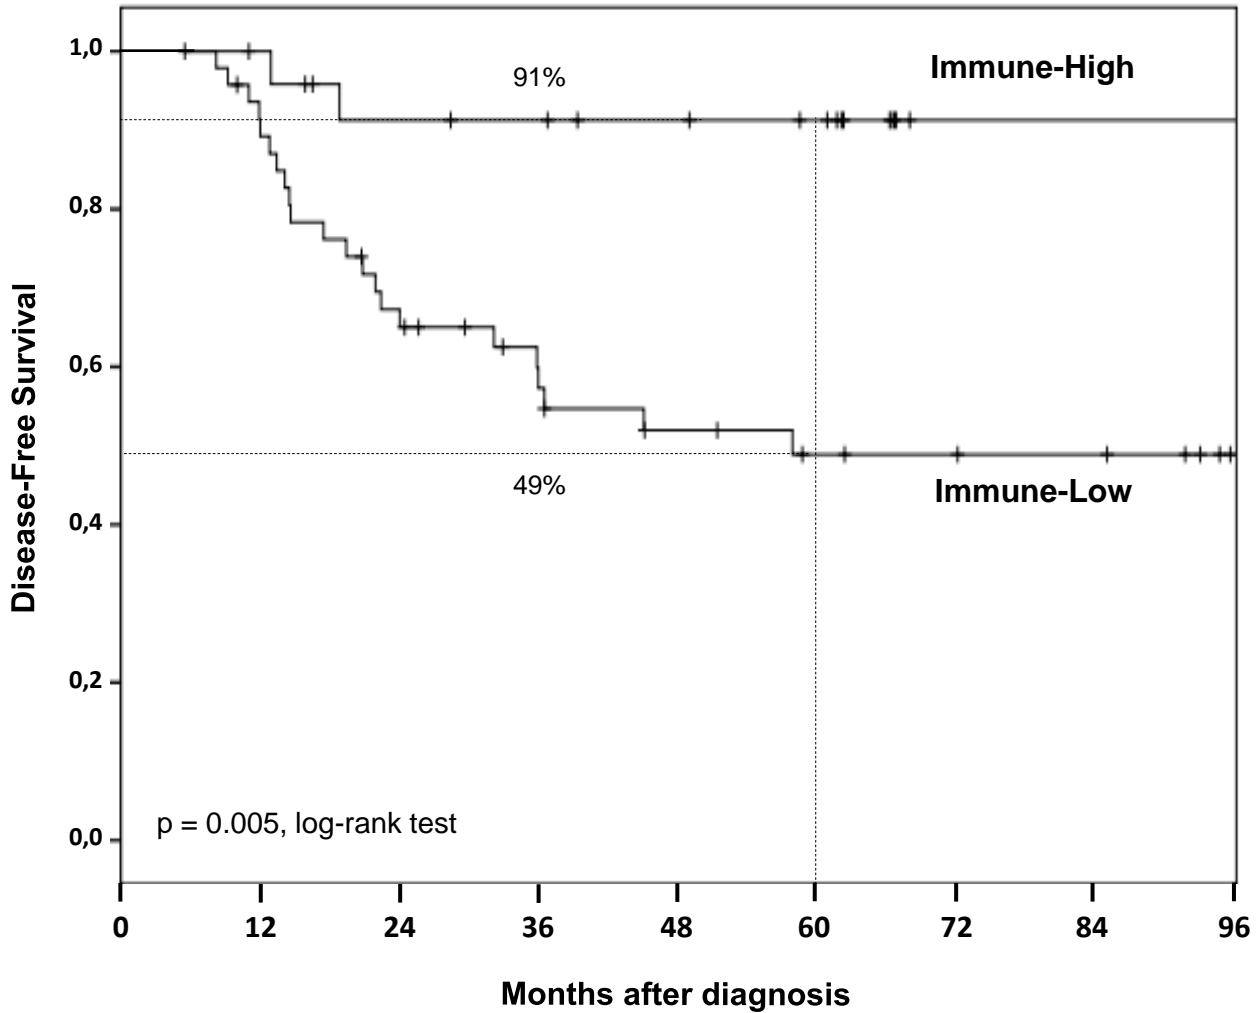

Supplement: MOESM13 [file 9551998]
